# Supplementary material for: A Simplified Method for Three-Dimensional (3-D) Ovarian Tissue Culture Yielding Oocytes Competent to Produce Full-Term Offspring in Mice
Source: PubMed Central journal article supplement (PMC4646357; doi:10.1371/journal.pone.0143114), 2015-11-16
Supplement: pone.0143114.s001.pdf [file pone.0143114.s001.pdf]

**S1 Table. Follicle and oocyte growth during the ovarian tissue culture.**

|           | Day 0                                    |                                                         |                                                       | Day 6                                    |                                                         |                                                       | Day 10                                      |                                                         |                                                       |
|-----------|------------------------------------------|---------------------------------------------------------|-------------------------------------------------------|------------------------------------------|---------------------------------------------------------|-------------------------------------------------------|---------------------------------------------|---------------------------------------------------------|-------------------------------------------------------|
| Condition | No. of follicles/<br>oocytes<br>analyzed | Follicle<br>diameter<br>( $\mu\text{m} \pm \text{SD}$ ) | Oocyte<br>diameter<br>( $\mu\text{m} \pm \text{SD}$ ) | No. of follicles/<br>oocytes<br>analyzed | Follicle<br>diameter<br>( $\mu\text{m} \pm \text{SD}$ ) | Oocyte<br>diameter<br>( $\mu\text{m} \pm \text{SD}$ ) | No. of<br>Follicles/<br>oocytes<br>analyzed | Follicle<br>diameter<br>( $\mu\text{m} \pm \text{SD}$ ) | Oocyte<br>diameter<br>( $\mu\text{m} \pm \text{SD}$ ) |
| C         | 145                                      | 130.9 $\pm$ 18.5                                        | 58.6 $\pm$ 4.5                                        | 165                                      | 270.8 $\pm$ 48.5                                        | 67.2 $\pm$ 4.0                                        | 165                                         | 356.0 $\pm$ 44.8                                        | 73.5 $\pm$ 4.1                                        |
| A         |                                          |                                                         |                                                       | 15                                       | 286.7 $\pm$ 25.4                                        | 68.6 $\pm$ 1.1                                        | 15                                          | 299.2 $\pm$ 22.6                                        | 73.9 $\pm$ 2.3                                        |
| M         |                                          |                                                         |                                                       | 60                                       | 289 $\pm$ 35.2                                          | 71.3 $\pm$ 3.4                                        | 60                                          | 309.6 $\pm$ 30.8                                        | 74.1 $\pm$ 3.9                                        |
| M+A       |                                          |                                                         |                                                       | 75                                       | 290.4 $\pm$ 36.8                                        | 72.8 $\pm$ 2.9                                        | 75                                          | 335.1 $\pm$ 31.3                                        | 76.3 $\pm$ 2.8                                        |
