# Supplementary material for: A Simplified Method for Three-Dimensional (3-D) Ovarian Tissue Culture Yielding Oocytes Competent to Produce Full-Term Offspring in Mice
Source: PubMed Central journal article supplement (PMC4646357; doi:10.1371/journal.pone.0143114), 2015-11-16
Supplement: pone.0143114.s002.pdf [file pone.0143114.s002.pdf]

**S2 Table. Chromatin configuration of GV oocytes.**

| Day of analysis | Condition | Total No. of oocytes | Chromatin Configuration |           |           |
|-----------------|-----------|----------------------|-------------------------|-----------|-----------|
|                 |           |                      | NSN (%)                 | Int (%)   | SN (%)    |
| Day 0           | C         | 45                   | 45 (100)                | 0         | 0         |
|                 | A         |                      |                         |           |           |
|                 | M         |                      |                         |           |           |
|                 | M+A       |                      |                         |           |           |
| Day 6           | C         | 44                   | 21 (47.7)               | 13 (29.5) | 10 (22.7) |
|                 | A         | 29                   | 11 (37.9)               | 12 (41.4) | 6 (20.7)  |
|                 | M         | 44                   | 7 (15.9)                | 22 (50.0) | 15 (34.1) |
|                 | M+A       | 47                   | 1 (2.1)                 | 28 (59.6) | 18 (38.3) |
| Day 10          | C         | 39                   | 0                       | 1 (2.6)   | 38 (97.4) |
|                 | A         | 41                   | 0                       | 1 (2.4)   | 40 (97.6) |
|                 | M         | 45                   | 0                       | 0         | 45 (100)  |
|                 | M+A       | 44                   | 0                       | 0         | 44 (100)  |

NSN: Non Surrounded Nucleolus

Int: Intermediate stage

SN: Surrounded Nucleolus
