# Supplementary material for: A Simplified Method for Three-Dimensional (3-D) Ovarian Tissue Culture Yielding Oocytes Competent to Produce Full-Term Offspring in Mice
Source: PubMed Central journal article supplement (PMC4646357; doi:10.1371/journal.pone.0143114), 2015-11-16
Supplement: pone.0143114.s003.pdf [file pone.0143114.s003.pdf]

**S3 Table. Newborn offspring after 2-cell embryo transfer.**

**C (Control)**

| <b>No. of Exp.</b> | <b>No. of 2-cell embryos transferred<br/>(No. of surrogates)</b> | <b>No. of pups</b> |
|--------------------|------------------------------------------------------------------|--------------------|
| <b>1</b>           | <b>15 (2)</b>                                                    | <b>0</b>           |
| <b>2</b>           | <b>15 (2)</b>                                                    | <b>0</b>           |
| <b>3</b>           | <b>10 (1)</b>                                                    | <b>1</b>           |
| <b>Total</b>       | <b>40 (5)</b>                                                    | <b>1 (2.5%)</b>    |

**A (Activin)**

| <b>No. of Exp.</b> | <b>No. of 2-cell embryos transferred<br/>(No. of surrogates)</b> | <b>No. of pups</b> |
|--------------------|------------------------------------------------------------------|--------------------|
| <b>1</b>           | <b>7 (1)</b>                                                     | <b>0</b>           |
| <b>2</b>           | <b>6 (1)</b>                                                     | <b>0</b>           |
| <b>3</b>           | <b>7 (1)</b>                                                     | <b>0</b>           |
| <b>Total</b>       | <b>20 (3)</b>                                                    | <b>0</b>           |

### **M (Matrigel)**

| <b>No. of Exp.</b> | <b>No. of 2-cell embryos transferred<br/>(No. of surrogates)</b> | <b>No. of pups</b> |
|--------------------|------------------------------------------------------------------|--------------------|
| <b>1</b>           | <b>15 (1)</b>                                                    | <b>0</b>           |
| <b>2</b>           | <b>38 (2)</b>                                                    | <b>3</b>           |
| <b>3</b>           | <b>9 (1)</b>                                                     | <b>1</b>           |
| <b>4</b>           | <b>18 (1)</b>                                                    | <b>1</b>           |
| <b>Total</b>       | <b>80 (5)</b>                                                    | <b>5 (6.3%)</b>    |

### **M+A (Matrigel + Activin A)**

| <b>No. of Exp.</b> | <b>No. of 2-cell embryos transferred<br/>(No. of surrogates)</b> | <b>No. of pups</b> |
|--------------------|------------------------------------------------------------------|--------------------|
| <b>1</b>           | <b>17 (2)</b>                                                    | <b>4</b>           |
| <b>2</b>           | <b>17 (2)</b>                                                    | <b>2</b>           |
| <b>3</b>           | <b>10 (1)</b>                                                    | <b>1</b>           |
| <b>4</b>           | <b>11 (1)</b>                                                    | <b>1</b>           |
| <b>Total</b>       | <b>55 (6)</b>                                                    | <b>8 (14.5%)</b>   |
