# Supplementary material for: A Simplified Method for Three-Dimensional (3-D) Ovarian Tissue Culture Yielding Oocytes Competent to Produce Full-Term Offspring in Mice
Source: PubMed Central journal article supplement (PMC4646357; doi:10.1371/journal.pone.0143114), 2015-11-16
Supplement: pone.0143114.s004.pdf [file pone.0143114.s004.pdf]

**S4 Table. Body and placenta weights of newborn offspring.**

**C (Control)**

| <b>No. of Exp. *</b> | <b>Sex</b> | <b>Body weight (g)</b> | <b>Placenta weight (g)</b> |
|----------------------|------------|------------------------|----------------------------|
| <b>3</b>             | <b>M</b>   | <b>1.62</b>            | <b>0.15</b>                |

\* No. of Exp. of ET (see Table S4).

**A (Activin)**

No full-term pup was obtained.

**M (Matrigel)**

| <b>No. of Exp. *</b> | <b>Sex</b> | <b>Body weight (g)</b> | <b>Placenta weight (g)</b> |
|----------------------|------------|------------------------|----------------------------|
| <b>2</b>             | <b>F</b>   | <b>1.35</b>            | <b>0.13</b>                |
| <b>2</b>             | <b>F</b>   | <b>2.4</b>             | <b>0.16</b>                |
| <b>2</b>             | <b>F</b>   | <b>2.14</b>            | <b>0.16</b>                |
| <b>3</b>             | <b>F</b>   | <b>1.54</b>            | <b>0.16</b>                |
| <b>4</b>             | <b>M</b>   | <b>1.89</b>            | <b>0.14</b>                |
| <b>Average ± SD</b>  |            | <b>1.86 ± 0.38</b>     | <b>0.15 ± 0.014</b>        |

\* No. of Exp. of ET (see Table S4).

**M+A (Matrigel + Activin A)**

| <b>No. of Exp. *</b> | <b>Sex</b> | <b>Body weight (g)</b> | <b>Placenta weight (g)</b> |
|----------------------|------------|------------------------|----------------------------|
| <b>1</b>             | <b>F</b>   | <b>1.62</b>            | <b>0.15</b>                |
| <b>1</b>             | <b>F</b>   | <b>1.56</b>            | <b>0.14</b>                |
| <b>1</b>             | <b>F</b>   | <b>1.64</b>            | <b>0.15</b>                |
| <b>1</b>             | <b>M</b>   | <b>1.43</b>            | <b>0.16</b>                |
| <b>2</b>             | <b>F</b>   | <b>1.76</b>            | <b>0.18</b>                |
| <b>2</b>             | <b>F</b>   | <b>1.36</b>            | <b>0.14</b>                |
| <b>3</b>             | <b>M</b>   | <b>1.02</b>            | <b>0.1</b>                 |
| <b>4</b>             | <b>F</b>   | <b>1.71</b>            | <b>0.18</b>                |
| <b>Average ± SD</b>  |            | <b>1.51 ± 0.24</b>     | <b>0.15 ± 0.026</b>        |

\* No. of Exp. of ET (see Table S4).

***In Vivo* Control (natural mating)**

| <b>No. of Exp.**</b> | <b>Sex</b> | <b>Body weight (g)</b> | <b>Placenta weight (g)</b> |
|----------------------|------------|------------------------|----------------------------|
| <b>1</b>             | <b>F</b>   | <b>1.3</b>             | <b>0.14</b>                |
| <b>1</b>             | <b>F</b>   | <b>1.26</b>            | <b>0.14</b>                |
| <b>1</b>             | <b>M</b>   | <b>1.46</b>            | <b>0.12</b>                |
| <b>1</b>             | <b>F</b>   | <b>1.32</b>            | <b>0.1</b>                 |
| <b>1</b>             | <b>M</b>   | <b>1.35</b>            | <b>0.11</b>                |
| <b>1</b>             | <b>F</b>   | <b>1.24</b>            | <b>0.1</b>                 |
| <b>1</b>             | <b>F</b>   | <b>1.24</b>            | <b>0.09</b>                |
| <b>Average ± SD</b>  |            | <b>1.31 ± 0.08</b>     | <b>0.11 ± 0.014</b>        |

\*\* Derived from one litter.
